# Supplementary material for: Warming Mitigates the Impacts of Degradation on Nitrogen Allocation between Soil Microbes and Plants in Alpine Meadow
Source: MDPI journal article supplement (doi:10.3390/agronomy14030508), 2024-02-29
Supplement: s1 [file s1]

Archive with 1 entries (1 files):
- agronomy-2842885-supplementary.pdf
