# Supplementary material for: Warming Mitigates the Impacts of Degradation on Nitrogen Allocation between Soil Microbes and Plants in Alpine Meadow
Source: MDPI journal article supplement (doi:10.3390/agronomy14030508), 2024-02-29
Supplement: s1 [file s1 › agronomy-2842885-supplementary.pdf]

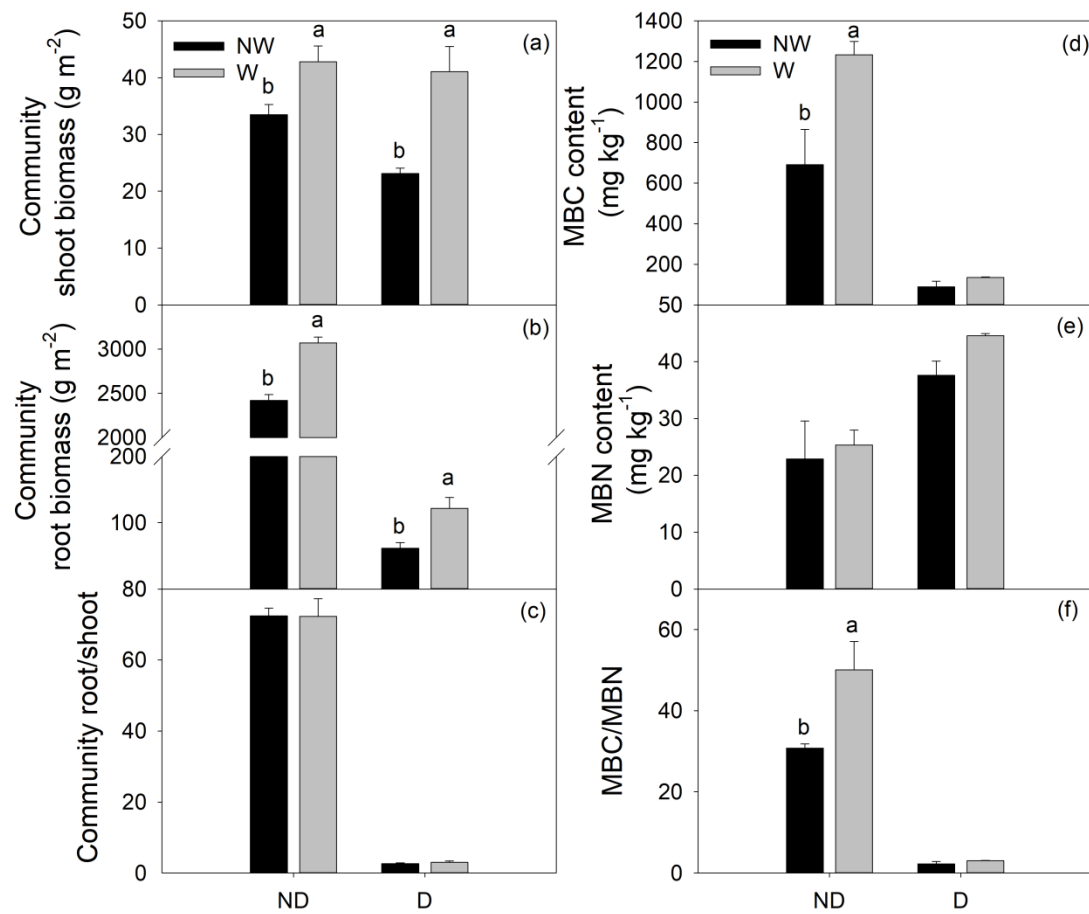

Figure S1 Separate effects of warming on plant community biomass(a-c), MBC and MBN content(d-f) in plots with and without degradation in alpine meadow. Significant differences ( $p < 0.05$ ) are marked with different letters above bars, comparing no warming (NW) to warming (W). D and ND represent degradation and no degradation, respectively.
